# Supplementary material
Source: ML conference proceedings conference paper supplement (https://www.ecva.net/papers/eccv_2020/papers_ECCV/html/123560392_ECCV_2020_paper.php)
Supplement: Supplementary file 3 [file 123560392-supp.zip]

Archive with 2 entries (2 files):
- 1358-supplementary.pdf
- __MACOSX/._1358-supplementary.pdf
